# Supplementary material
Source: MDPI journal article supplement (https://www.mdpi.com/2311-5637/7/2/83)
Supplement: s1 [file s1]

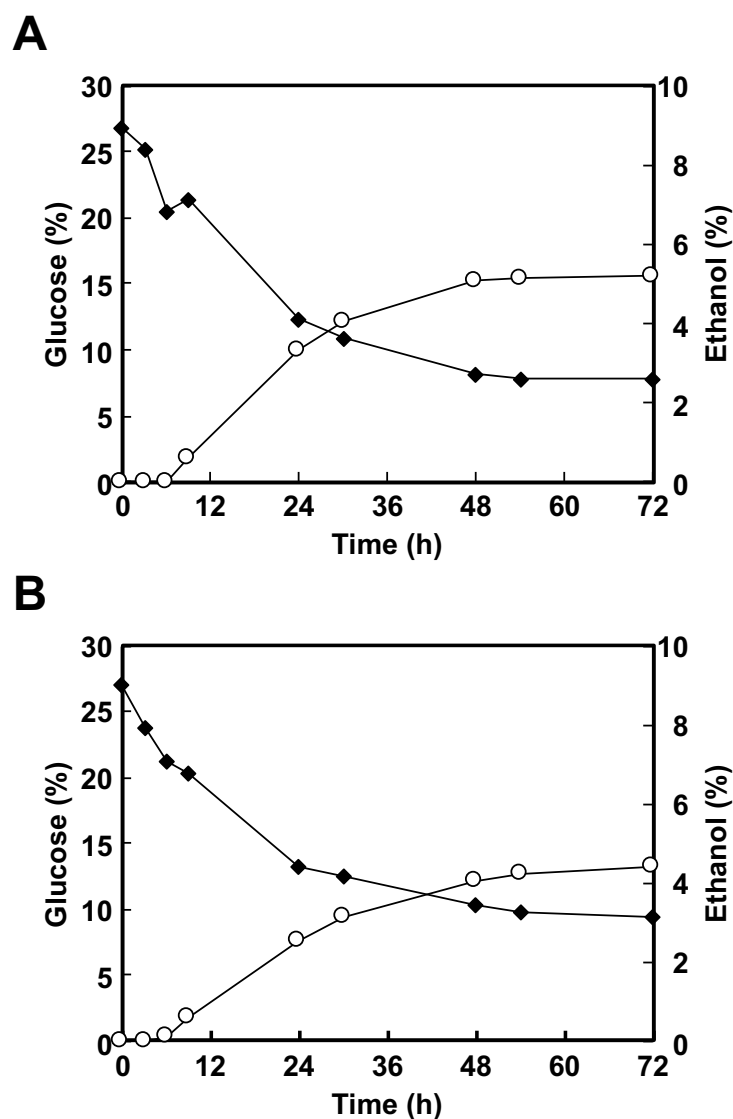

**Figure S1.** Time-dependent changes in ethanol (white circle) and glucose (black square) produced by *P. kudriavzevii* NBRC1279 (A) and NBRC1664 (B). Both strains were first cultivated aerobically in YPD medium containing glucose (27 g/L) for 36 h at 30 °C. The cells were collected by centrifugation at  $6,000 \times g$  for 5 min at 4 °C, and then washed with sterile water twice. The washed strains were inoculated into the fresh medium and cultured under anaerobic conditions. Anaerobic batch fermentation experiments were performed at 30 °C in closed bottles (50 mL) containing 20 mL of fermentation medium (YPD) to which magnetic stir bars (2 cm in diameter) were added and the cultures were grown with mild agitation.

**Table S1.** The other sugar concentration during bioethanol production with *P. kudriavzevii* NBRC1279 using Japanese cedar particles.

| Time (h) | Galactose (g/L) |      |      |      |      | Mannose (g/L) |      |      |      |      | Arabinose (g/L) |      |       |      |      | Xylose (g/L) |      |      |      |      |
|----------|-----------------|------|------|------|------|---------------|------|------|------|------|-----------------|------|-------|------|------|--------------|------|------|------|------|
|          | 30°C            | 37°C | 40°C | 42°C | 45°C | 30°C          | 37°C | 40°C | 42°C | 45°C | 30°C            | 37°C | 40°C  | 42°C | 45°C | 30°C         | 37°C | 40°C | 42°C | 45°C |
| 3        | 0.17            | 0.23 | 0.21 | 0.25 | 0.23 | 0.11          | 0.13 | 0.11 | 0.12 | 0.13 | 0.04            | 0.04 | 0.04  | 0.05 | 0.05 | 0.32         | 0.34 | 0.34 | 0.36 | 0.36 |
| 6        | 0.18            | 0.20 | 0.19 | 0.33 | 0.25 | 0.07          | 0.13 | 0.14 | 0.16 | 0.17 | 0.08            | 0.05 | 0.05  | 0.06 | 0.05 | 0.37         | 0.36 | 0.40 | 0.40 | 0.41 |
| 12       | 0.24            | 0.24 | 0.26 | 0.30 | 0.25 | 0.14          | 0.16 | 0.15 | 0.32 | 0.21 | 0.05            | 0.05 | 0.06  | 0.14 | 0.06 | 0.46         | 0.51 | 0.45 | 0.49 | 0.46 |
| 24       | 0.25            | 0.29 | 0.31 | 0.33 | 0.22 | 0.18          | 0.17 | 0.28 | 0.37 | 0.34 | 0.07            | 0.07 | N.D.* | N.D. | 0.02 | 0.47         | 0.51 | 0.54 | 0.51 | 0.48 |
| 48       | 0.28            | 0.38 | 0.34 | 0.28 | 0.24 | 0.14          | 0.17 | 0.30 | 0.39 | 0.47 | 0.08            | 0.07 | N.D.  | N.D. | N.D. | 0.50         | 0.54 | 0.57 | 0.53 | 0.52 |
| 72       | 0.29            | 0.40 | 0.36 | 0.37 | 0.22 | 0.16          | 0.19 | 0.33 | 0.41 | 0.52 | 0.08            | 0.06 | N.D.  | 0.03 | N.D. | 0.52         | 0.50 | 0.58 | 0.55 | 0.54 |
| 96       | 0.30            | 0.42 | 0.38 | 0.40 | 0.25 | 0.20          | 0.19 | 0.33 | 0.49 | 0.55 | 0.07            | 0.07 | N.D.  | N.D. | N.D. | 0.52         | 0.57 | 0.59 | 0.57 | 0.55 |
| 120      | 0.26            | 0.38 | 0.40 | 0.42 | 0.31 | 0.18          | N.D. | 0.37 | 0.54 | 0.62 | 0.07            | 0.20 | N.D.  | N.D. | N.D. | 0.47         | 0.58 | 0.57 | 0.59 | 0.59 |
| 144      | 0.30            | 0.44 | 0.42 | 0.45 | 0.31 | 0.22          | N.D. | 0.40 | 0.58 | 0.66 | 0.08            | 0.21 | N.D.  | N.D. | N.D. | 0.52         | 0.62 | 0.57 | 0.60 | 0.60 |

\*N.D. means not detected.

**Table S2.** The other sugar concentration during bioethanol production with *P. kudriavzevii* NBRC1664 using Japanese cedar particles.

| Time (h) | Galactose (g/L) |      |      |      |      | Mannose (g/L) |      |      |      |      | Arabinose (g/L) |      |      |      |       | Xylose (g/L) |      |      |      |      |
|----------|-----------------|------|------|------|------|---------------|------|------|------|------|-----------------|------|------|------|-------|--------------|------|------|------|------|
|          | 30°C            | 37°C | 40°C | 42°C | 45°C | 30°C          | 37°C | 40°C | 42°C | 45°C | 30°C            | 37°C | 40°C | 42°C | 45°C  | 30°C         | 37°C | 40°C | 42°C | 45°C |
| 3        | 0.16            | 0.21 | 0.20 | 0.23 | 0.26 | 0.11          | 0.11 | 0.14 | 0.12 | 0.16 | 0.04            | 0.05 | 0.06 | 0.05 | 0.03  | 0.32         | 0.32 | 0.34 | 0.35 | 0.35 |
| 6        | 0.18            | 0.21 | 0.21 | 0.34 | 0.25 | 0.10          | 0.13 | 0.19 | 0.16 | 0.17 | 0.06            | 0.07 | 0.05 | 0.06 | 0.05  | 0.36         | 0.39 | 0.38 | 0.40 | 0.41 |
| 12       | 0.24            | 0.21 | 0.31 | 0.32 | 0.25 | 0.14          | 0.16 | 0.24 | 0.25 | 0.25 | 0.06            | 0.06 | 0.01 | 0.02 | 0.04  | 0.47         | 0.48 | 0.47 | 0.46 | 0.45 |
| 24       | 0.28            | 0.31 | 0.31 | 0.39 | 0.27 | 0.17          | 0.18 | 0.25 | 0.31 | 0.41 | 0.07            | 0.06 | 0.01 | 0.02 | N.D.* | 0.49         | 0.49 | 0.56 | 0.55 | 0.49 |
| 48       | 0.26            | 0.36 | 0.33 | 0.33 | 0.23 | 0.16          | 0.19 | 0.28 | 0.36 | 0.46 | 0.06            | 0.06 | N.D. | N.D. | N.D.  | 0.52         | 0.51 | 0.56 | 0.56 | 0.52 |
| 72       | 0.31            | 0.35 | 0.34 | 0.33 | 0.23 | 0.15          | 0.18 | 0.30 | 0.39 | 0.52 | 0.08            | 0.07 | N.D. | N.D. | N.D.  | 0.52         | 0.50 | 0.58 | 0.56 | 0.54 |
| 96       | 0.34            | 0.41 | 0.39 | 0.33 | 0.28 | 0.19          | 0.19 | 0.32 | 0.41 | 0.58 | 0.06            | 0.07 | N.D. | N.D. | N.D.  | 0.52         | 0.55 | 0.56 | 0.56 | 0.57 |
| 120      | 0.27            | 0.42 | 0.39 | 0.43 | 0.33 | 0.16          | N.D. | 0.33 | 0.49 | 0.66 | 0.08            | 0.20 | N.D. | N.D. | N.D.  | 0.49         | 0.62 | 0.55 | 0.57 | 0.60 |
| 144      | 0.31            | 0.44 | 0.41 | 0.46 | 0.29 | 0.26          | 0.10 | 0.46 | 0.58 | 0.66 | 0.08            | 0.17 | N.D. | N.D. | N.D.  | 0.48         | 0.65 | 0.61 | 0.64 | 0.60 |

\*N.D. means not detected.

**Table S3.** The other sugar concentration during bioethanol production with *P. kudriavzevii* NBRC1279 using Japanese eucalyptus particles.

| Time (h) | Galactose (g/L) |      |      |      |      | Mannose (g/L) |       |      |      |      | Arabinose (g/L) |      |      |      |      | Xylose (g/L) |      |      |      |      |
|----------|-----------------|------|------|------|------|---------------|-------|------|------|------|-----------------|------|------|------|------|--------------|------|------|------|------|
|          | 30°C            | 37°C | 40°C | 42°C | 45°C | 30°C          | 37°C  | 40°C | 42°C | 45°C | 30°C            | 37°C | 40°C | 42°C | 45°C | 30°C         | 37°C | 40°C | 42°C | 45°C |
| 3        | 0.19            | 0.22 | 0.23 | 0.20 | 0.23 | 0.03          | 0.02  | 0.03 | 0.06 | 0.03 | 0.16            | 0.03 | 0.03 | 0.18 | 0.03 | 0.29         | 0.43 | 0.50 | 0.42 | 0.51 |
| 6        | 0.25            | 0.23 | 0.25 | 0.23 | 0.23 | 0.03          | 0.02  | 0.02 | 0.05 | 0.03 | 0.19            | 0.03 | 0.03 | 0.03 | 0.03 | 0.40         | 0.55 | 0.60 | 0.60 | 0.62 |
| 12       | 0.35            | 0.28 | 0.31 | 0.26 | 0.26 | 0.03          | 0.01  | 0.06 | 0.06 | 0.03 | 0.17            | 0.03 | 0.03 | 0.03 | 0.03 | 0.55         | 0.73 | 0.74 | 0.75 | 0.76 |
| 24       | 0.43            | 0.43 | 0.33 | 0.34 | 0.26 | 0.03          | N.D.* | 0.01 | 0.07 | 0.04 | 0.16            | 0.04 | 0.04 | 0.04 | 0.03 | 0.67         | 0.86 | 0.81 | 0.86 | 0.82 |
| 48       | 0.49            | 0.46 | 0.43 | 0.37 | 0.30 | 0.02          | N.D.  | N.D. | 0.06 | N.D. | 0.15            | 0.03 | 0.04 | 0.03 | 0.05 | 0.75         | 0.91 | 0.93 | 0.93 | 0.93 |
| 72       | 0.53            | 0.54 | 0.49 | 0.41 | 0.28 | N.D.          | N.D.  | 0.07 | 0.09 | 0.03 | 0.16            | 0.04 | 0.04 | 0.04 | 0.03 | 0.81         | 0.95 | 0.95 | 1.00 | 0.96 |
| 96       | 0.51            | 0.54 | 0.49 | 0.34 | 0.31 | 0.02          | N.D.  | N.D. | 0.07 | 0.04 | 0.15            | 0.04 | 0.05 | 0.03 | 0.04 | 0.81         | 0.96 | 1.02 | 1.00 | 1.02 |
| 120      | 0.54            | 0.59 | 0.44 | 0.41 | 0.32 | 0.02          | 0.07  | N.D. | 0.02 | 0.05 | 0.15            | 0.03 | 0.05 | 0.03 | 0.03 | 0.90         | 0.96 | 1.01 | 1.00 | 0.98 |
| 144      | 0.60            | 0.58 | 0.48 | 0.41 | 0.34 | N.D.          | 0.04  | N.D. | 0.05 | 0.10 | 0.16            | 0.03 | 0.05 | 0.03 | 0.05 | 0.95         | 0.97 | 1.03 | 1.02 | 1.06 |

\*N.D. means not detected.

**Table S4.** The other sugar concentration during bioethanol production with *P. kudriavzevii* NBRC1664 using Japanese eucalyptus particles.

| Time (h) | Galactose (g/L) |      |      |      |      | Mannose (g/L) |      |       |      |      | Arabinose (g/L) |      |      |      |      | Xylose (g/L) |      |      |      |      |
|----------|-----------------|------|------|------|------|---------------|------|-------|------|------|-----------------|------|------|------|------|--------------|------|------|------|------|
|          | 30°C            | 37°C | 40°C | 42°C | 45°C | 30°C          | 37°C | 40°C  | 42°C | 45°C | 30°C            | 37°C | 40°C | 42°C | 45°C | 30°C         | 37°C | 40°C | 42°C | 45°C |
| 3        | 0.19            | 0.23 | 0.22 | 0.21 | 0.22 | 0.03          | 0.03 | 0.03  | 0.08 | 0.03 | 0.15            | 0.03 | 0.03 | 0.17 | 0.03 | 0.31         | 0.45 | 0.50 | 0.47 | 0.51 |
| 6        | 0.21            | 0.22 | 0.25 | 0.23 | 0.23 | 0.03          | 0.02 | 0.02  | 0.06 | 0.03 | 0.19            | 0.03 | 0.03 | 0.03 | 0.03 | 0.41         | 0.54 | 0.60 | 0.60 | 0.62 |
| 12       | 0.35            | 0.26 | 0.33 | 0.27 | 0.25 | 0.03          | 0.01 | N.D.* | 0.06 | 0.03 | 0.17            | 0.03 | 0.04 | 0.03 | 0.03 | 0.55         | 0.72 | 0.75 | 0.74 | 0.76 |
| 24       | 0.42            | 0.45 | 0.33 | 0.35 | 0.25 | 0.03          | N.D. | N.D.  | 0.07 | 0.03 | 0.14            | 0.03 | 0.04 | 0.03 | 0.03 | 0.68         | 0.85 | 0.81 | 0.85 | 0.82 |
| 48       | 0.49            | 0.50 | 0.47 | 0.43 | 0.29 | N.D.          | N.D. | N.D.  | 0.06 | 0.02 | 0.14            | 0.04 | 0.03 | 0.04 | 0.04 | 0.77         | 0.92 | 0.95 | 0.93 | 0.92 |
| 72       | 0.54            | 0.51 | 0.60 | 0.40 | 0.28 | N.D.          | N.D. | 0.07  | 0.07 | 0.05 | 0.18            | 0.04 | 0.03 | 0.03 | 0.03 | 0.83         | 0.93 | 0.97 | 0.98 | 0.95 |
| 96       | 0.54            | 0.53 | 0.50 | 0.36 | 0.30 | N.D.          | N.D. | 0.07  | 0.08 | 0.05 | 0.17            | 0.04 | 0.04 | 0.03 | 0.03 | 0.84         | 0.94 | 1.01 | 0.98 | 1.02 |
| 120      | 0.59            | 0.59 | 0.49 | 0.45 | 0.32 | N.D.          | 0.05 | 0.01  | 0.04 | 0.05 | 0.17            | 0.03 | 0.03 | 0.03 | 0.03 | 0.95         | 0.95 | 0.92 | 1.00 | 0.97 |
| 144      | 0.57            | 0.53 | 0.64 | 0.42 | 0.33 | N.D.          | 0.03 | N.D.  | 0.04 | 0.02 | 0.16            | 0.03 | 0.04 | 0.03 | 0.04 | 0.91         | 0.91 | 1.02 | 0.98 | 1.06 |

\*N.D. means not detected.
